# Supplementary material for: Efficient click-addition sequence for polymer–polymer couplings
Source: Royal Society of Chemistry journal article supplement (doi:10.1039/c6py00954a), 2016-01-01
Supplement: c6py00954a1.pdf [file c6py00954a1.pdf]

## Supporting information

### Efficient click-addition sequence for polymer-polymer couplings

Johannes C. Brendel,<sup>a,b</sup> Guillaume Gody<sup>a</sup> and Sébastien Perrier<sup>\*a,b</sup>

<sup>a</sup> Department of Chemistry, University of Warwick, Gibbet Hill Road, Coventry CV4 7AL, United Kingdom.

<sup>b</sup> Faculty of Pharmacy and Pharmaceutical Sciences, Monash University, 381 Royal Parade, Parkville, VIC 3052, Australia.

\*s.perrier@warwick.ac.uk

#### NMR spectra of polymerization solutions

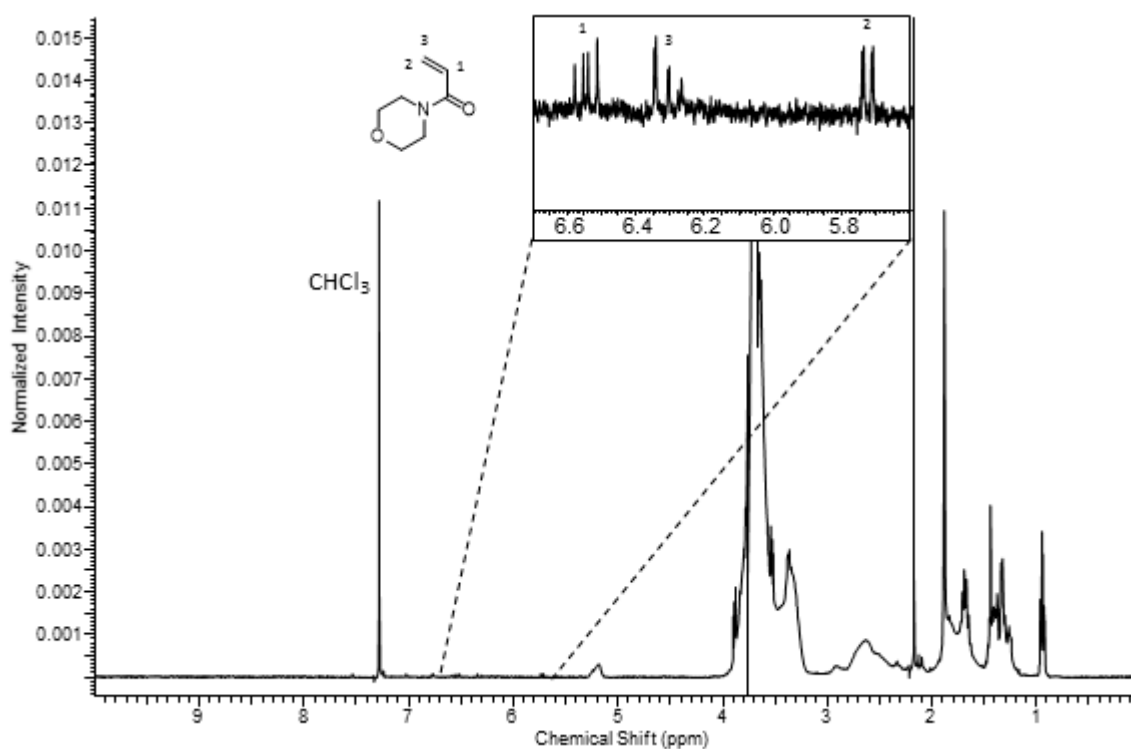

**Figure S 1.** NMR sample taken out of polymerization mixture for sample pNAM<sub>10</sub>.

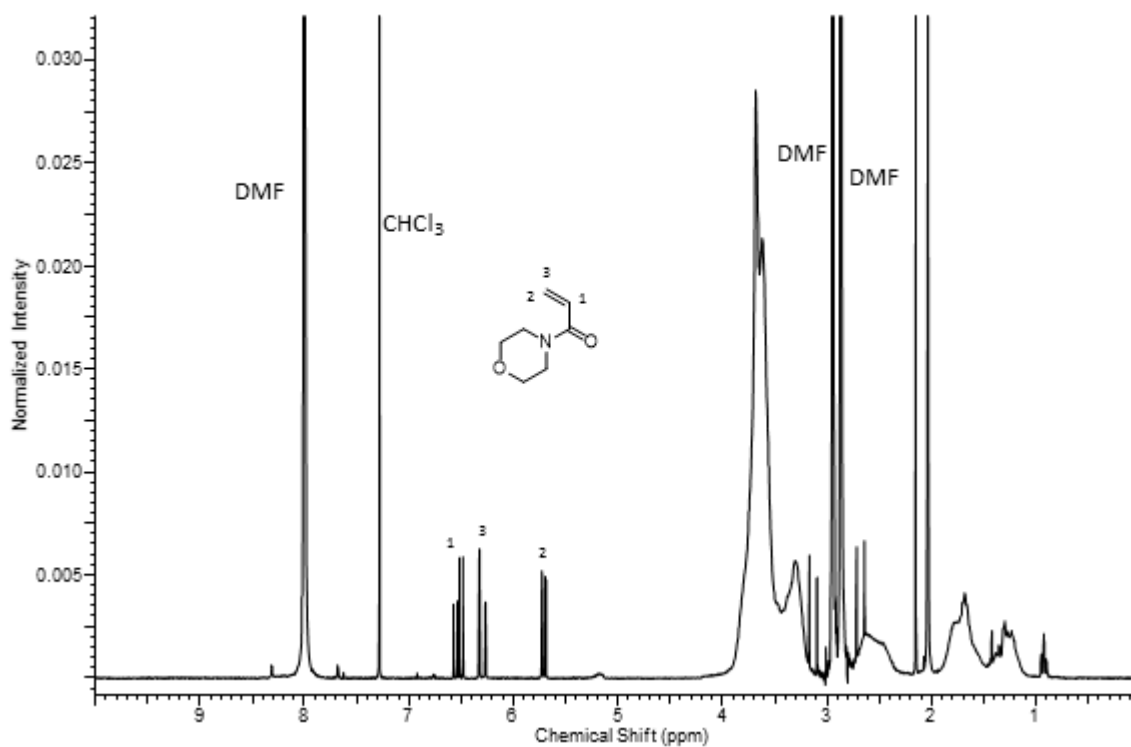

**Figure S 2.** NMR sample taken out of polymerization mixture for sample pNAM<sub>37</sub>.

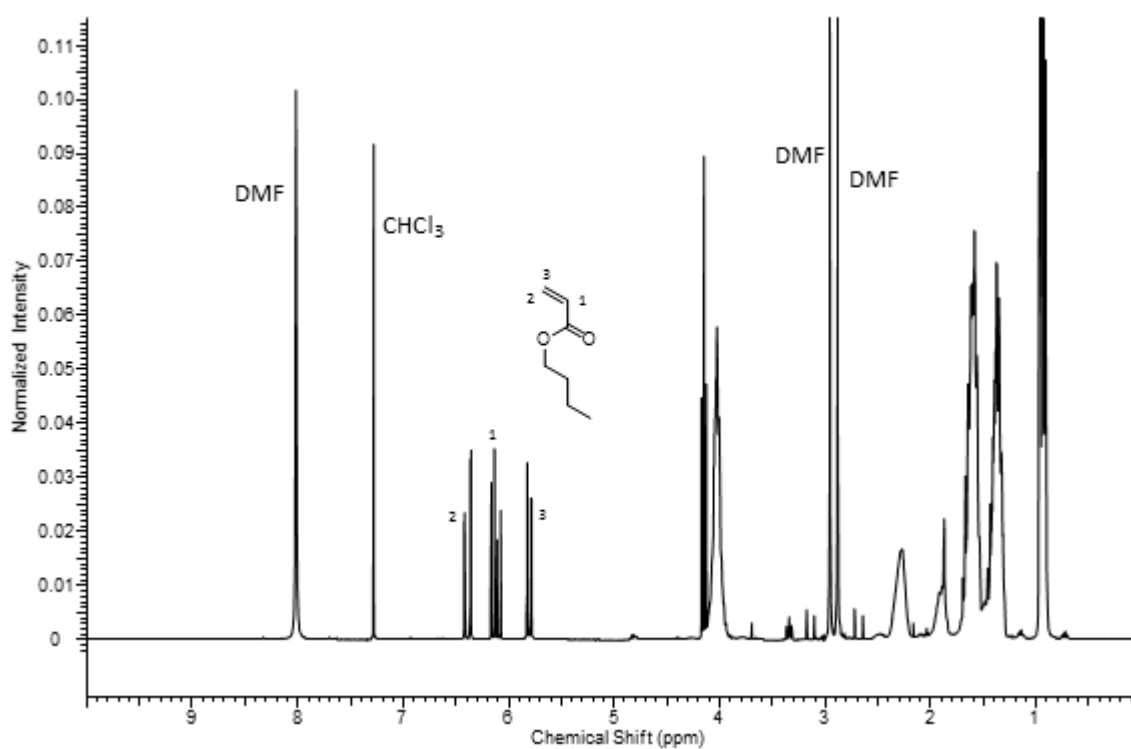

**Figure S 3.** NMR sample taken out of polymerization mixture for sample pBA<sub>42</sub>.

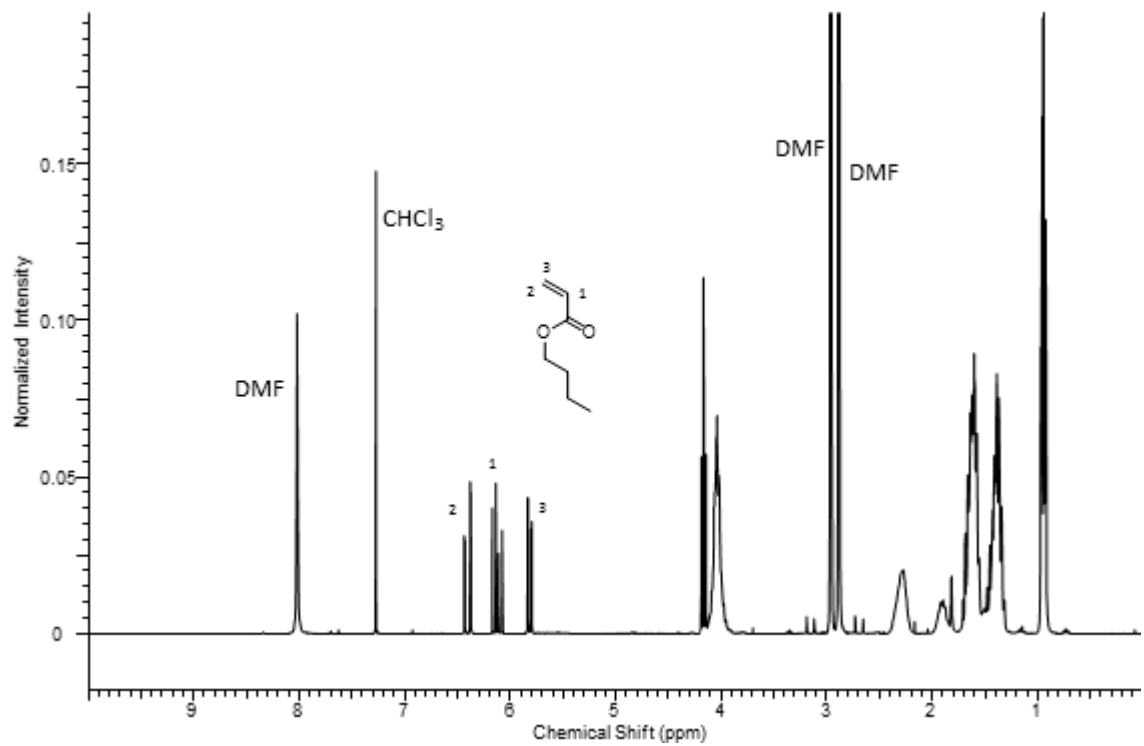

**Figure S 4.** NMR sample taken out of polymerization mixture for sample pBA<sub>206</sub>.

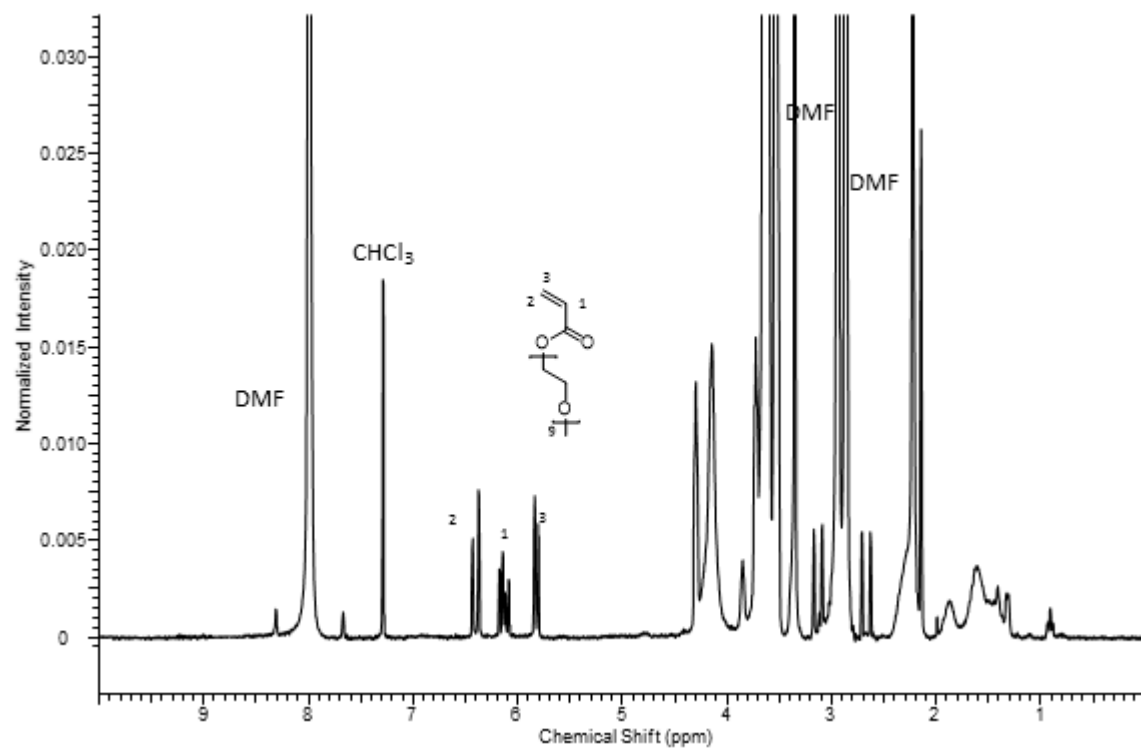

**Figure S 5.** NMR sample taken out of polymerization mixture for sample pPEGA<sub>38</sub>.

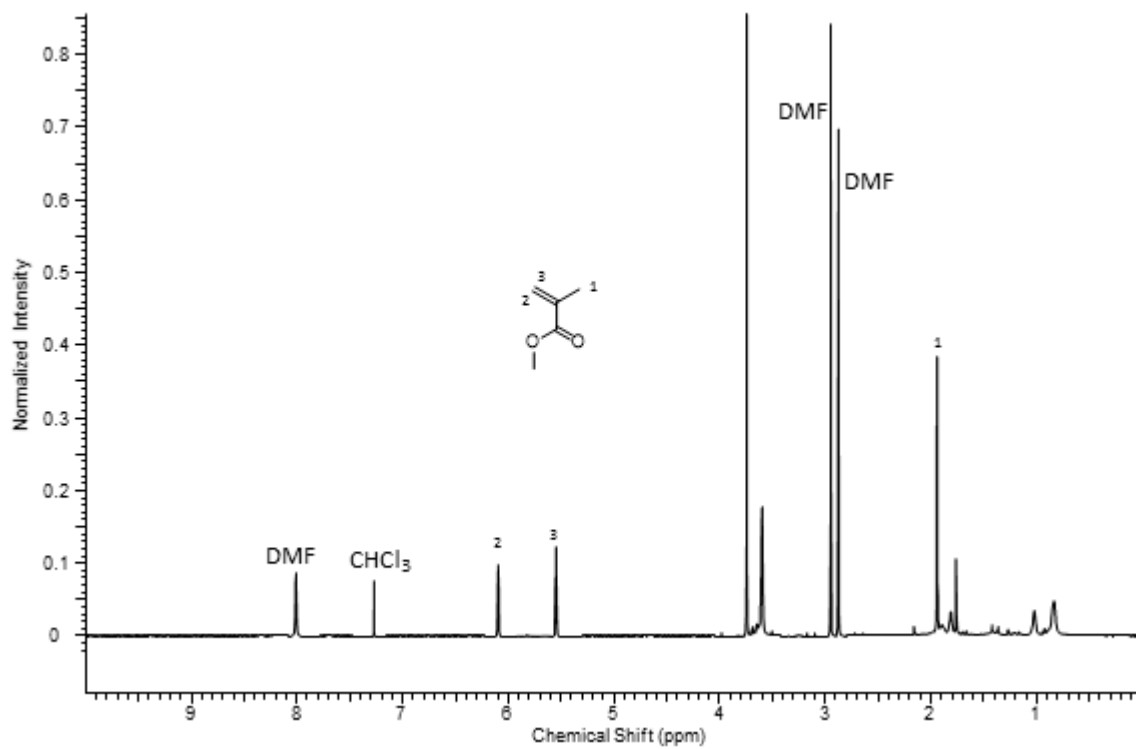

**Figure S 6.** NMR sample taken out of polymerization mixture for sample pMMA<sub>27</sub>.

## Electron spray ionisation-time of flight (ESI-ToF) measurements

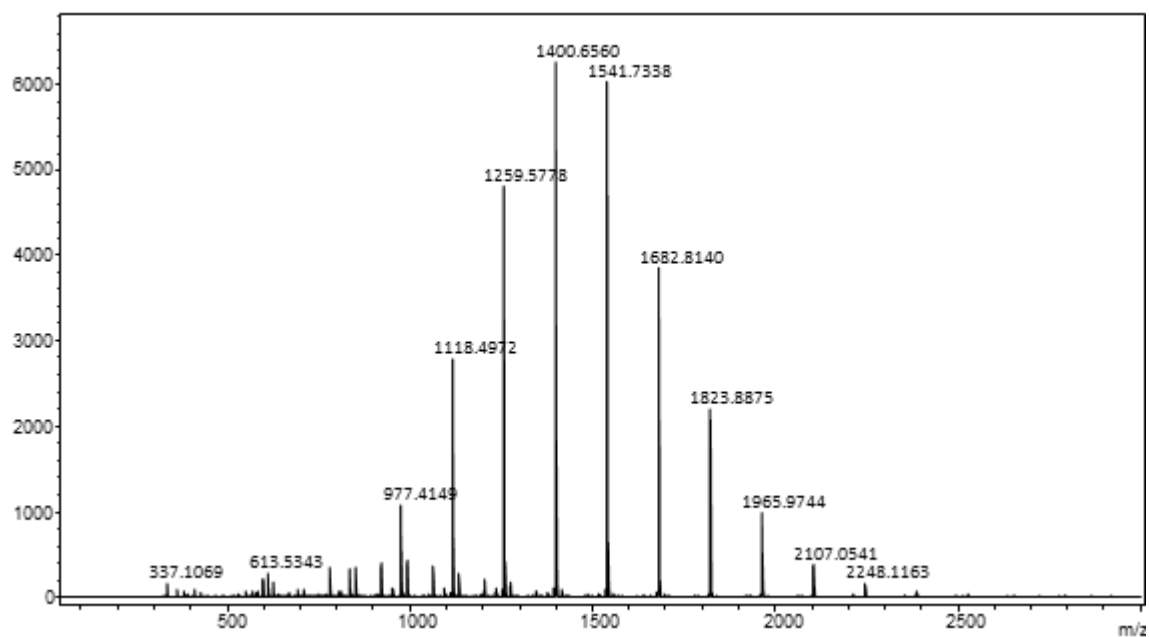

**Figure S 7.** Full ESI-ToF spectrum of the initial isocyanate modified polymer (pNAM<sub>10</sub>-NCO).

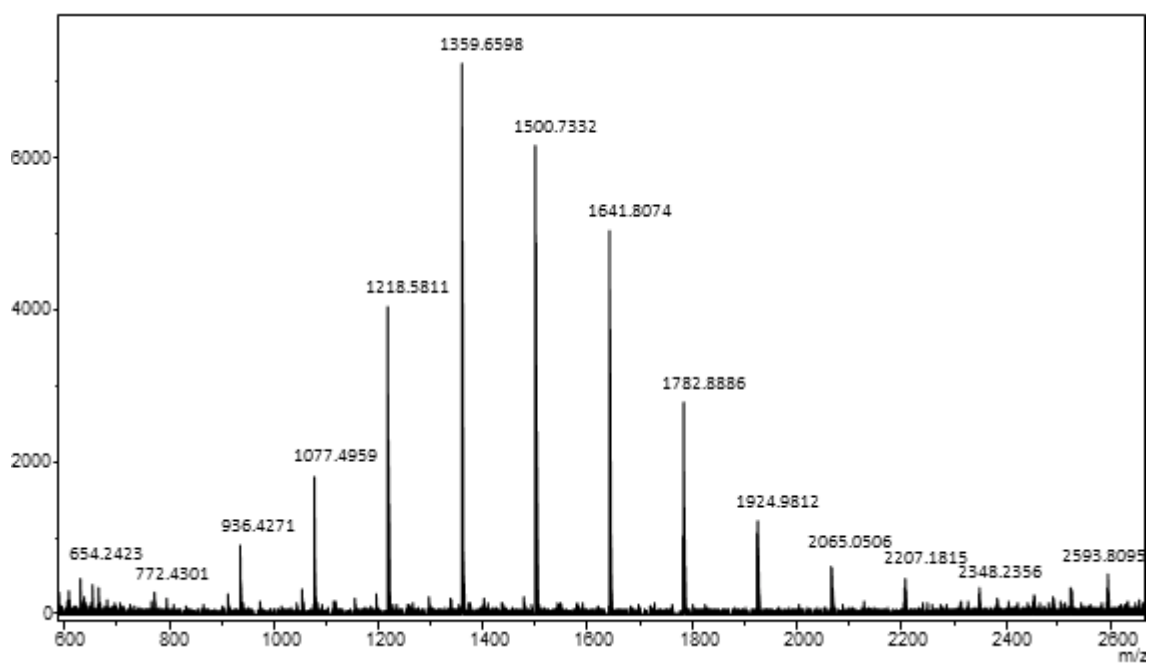

**Figure S 8.** Full ESI-ToF spectrum of the azido modified polymer (pNAM<sub>10</sub>-N<sub>3</sub>).

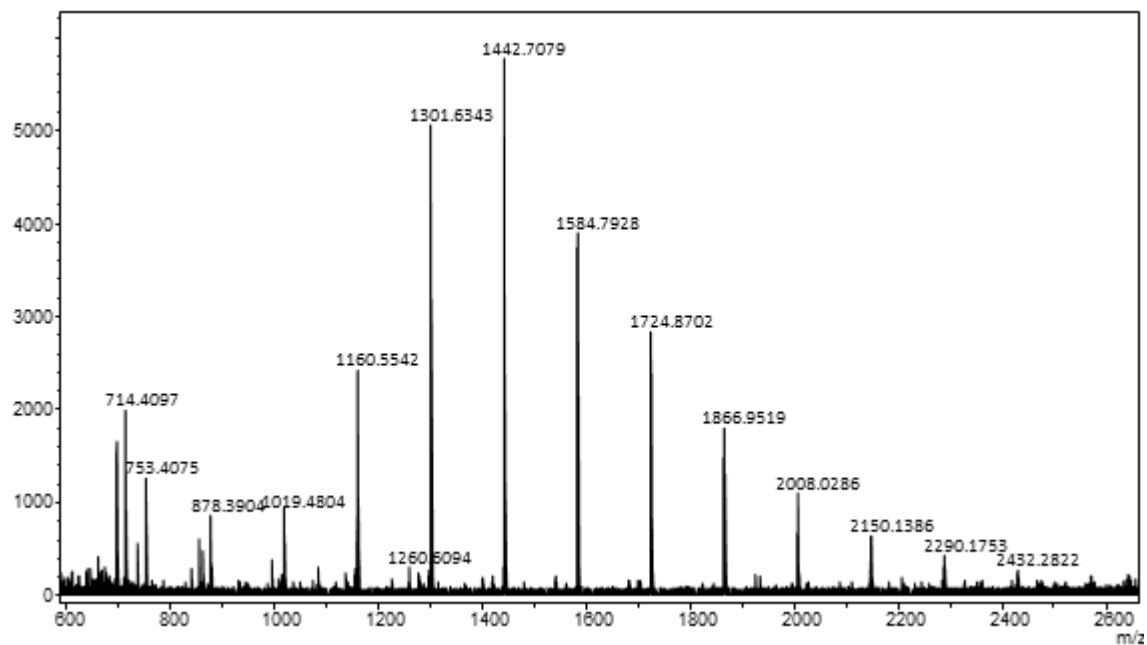

**Figure S 9.** Full ESI-ToF spectrum of the BCN modified polymer (pNAM<sub>10</sub>-BCN).

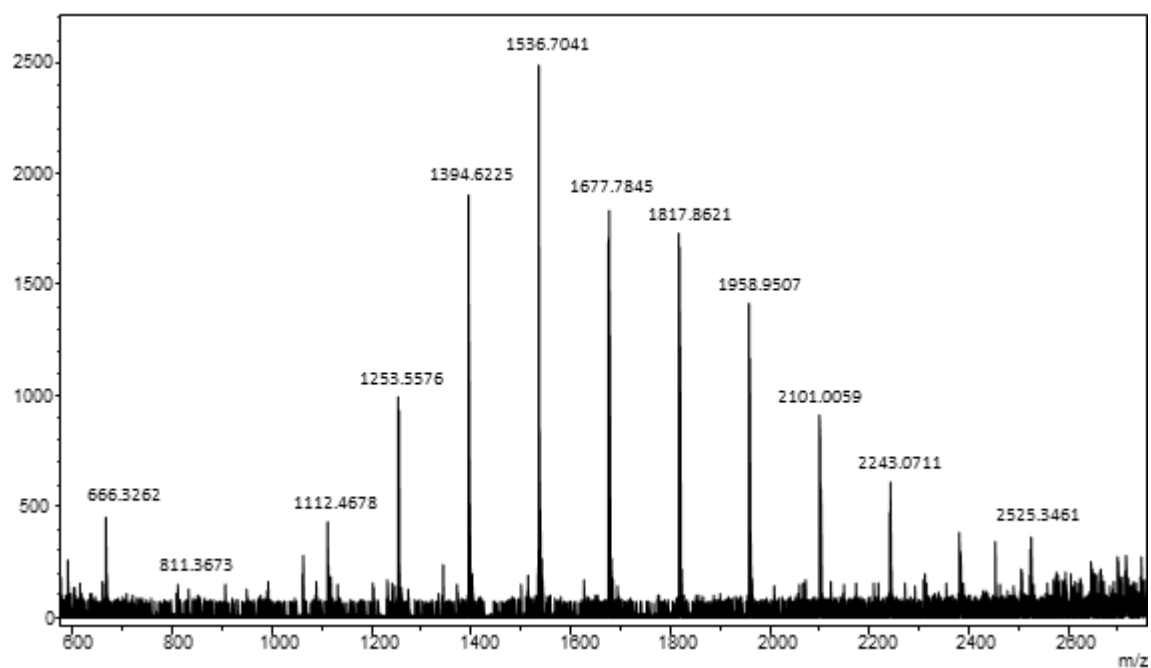

**Figure S 10.** Full ESI-ToF spectrum of the DBCO modified polymer (pNAM<sub>10</sub>-DBCO).

### NMR spectra of the amine-isocyanate reaction on pNAM<sub>10</sub>

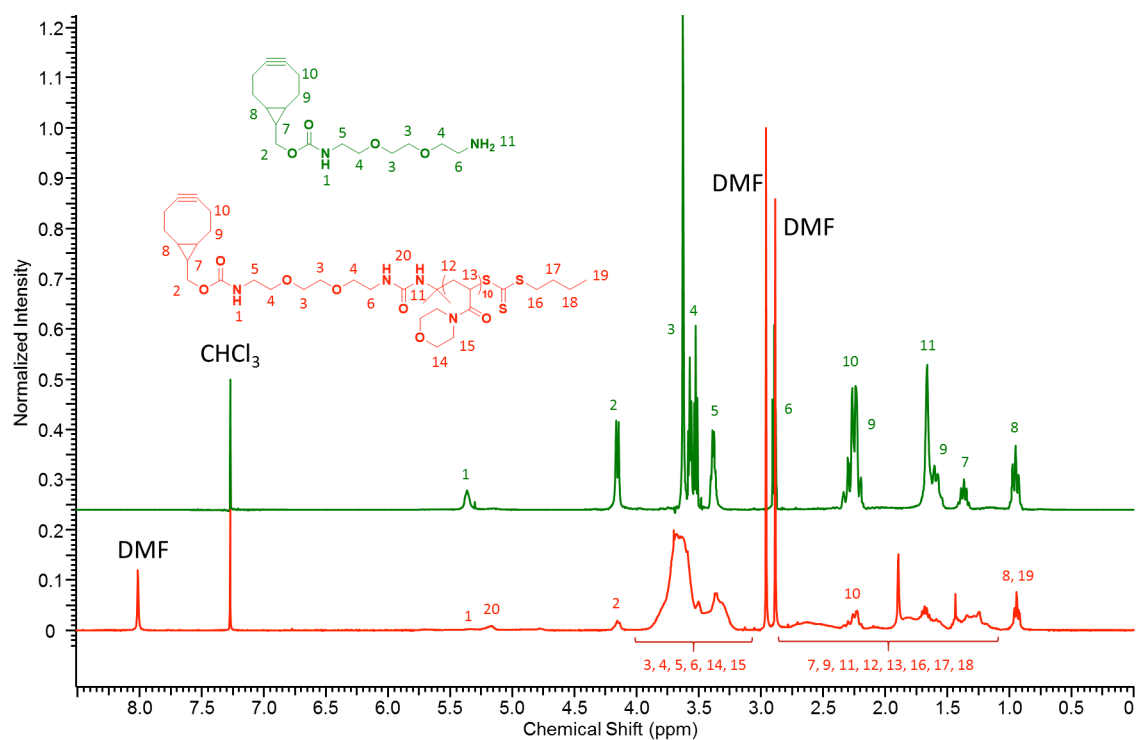

**Figure S 11.** NMR spectrum of a sample taken out of the reaction mixture (red) with pNAM<sub>10</sub>-NCO and the amine BCN-NH<sub>2</sub> after 4h. The NMR spectrum of the pure BCN-NH<sub>2</sub> (green) is given as a reference.

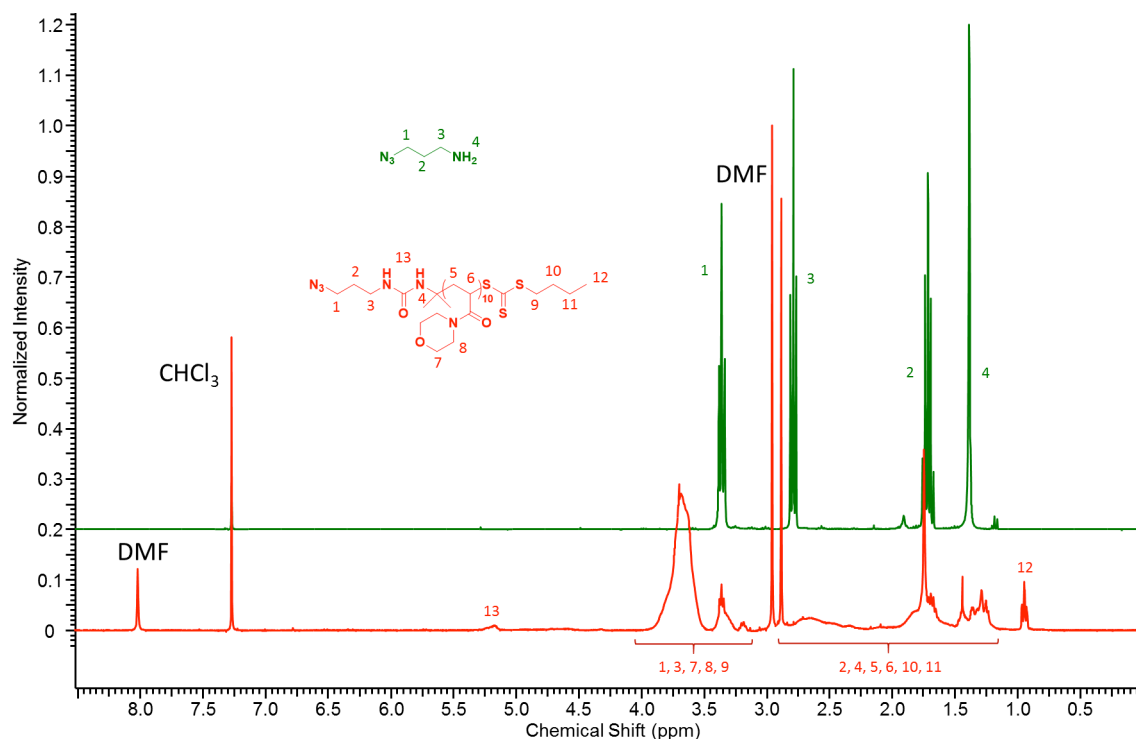

**Figure S 12.** NMR spectrum of a sample taken out of the reaction mixture (red) with pNAM<sub>10</sub>-NCO and azidopropylamine after 4h. The NMR spectrum of the pure azidopropylamine (green) is given as a reference.

## FT-IR spectra of amine-isocyanate reaction on pNAM<sub>10</sub> and the homocoupling

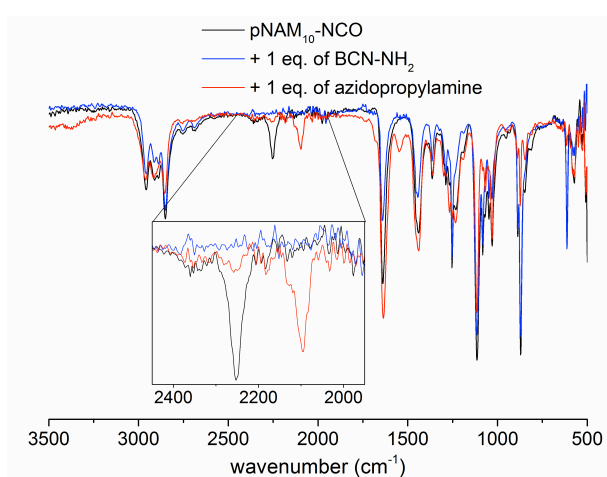

**Figure S 13.** FT-IR spectra of the starting material pNAM<sub>10</sub>-NCO (black), the product after addition of 1 equivalent of BCN-NH<sub>2</sub> (blue), and the product after addition of 1 equivalent of azidopropylamine (red). In both cases the characteristic signal for the isocyanate at 2250 cm<sup>-1</sup> disappears and for the product with azidopropylamine a new signal at 2095 cm<sup>-1</sup> is detected which is characteristic for azide groups.

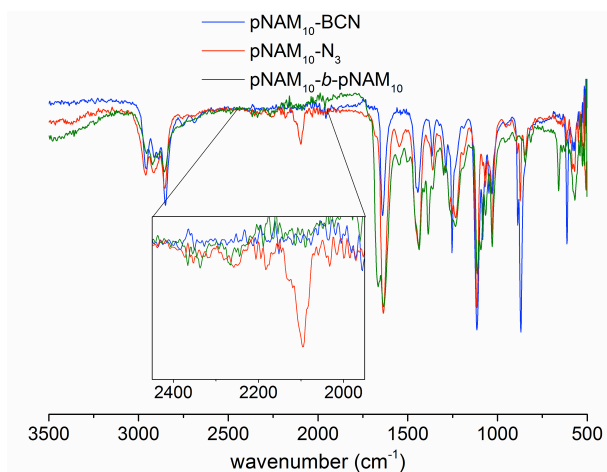

**Figure S 14.** FT-IR spectra of the SPAAC between pNAM<sub>10</sub>-BCN (blue) and pNAM<sub>10</sub>-N<sub>3</sub> (red). The characteristic signal for the azide at 2095 cm<sup>-1</sup> disappears after 4h of reaction (green).



## Raw RI signals and number distribution plots of homocouplings

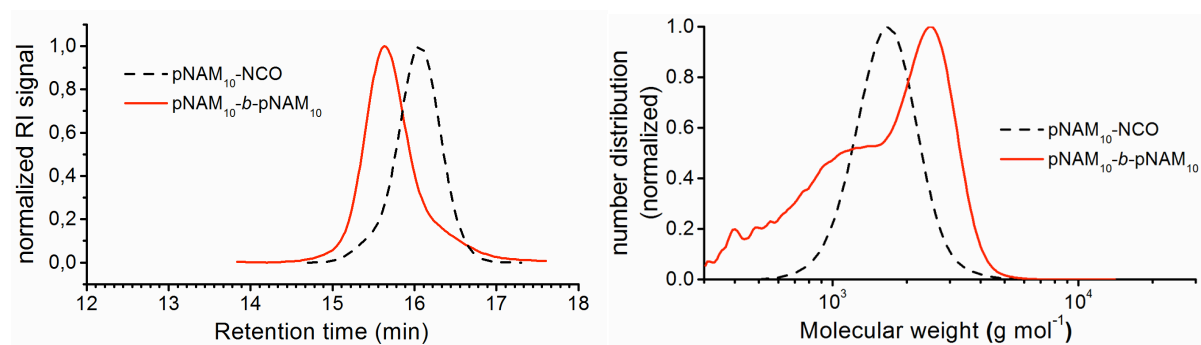

**Figure S 15.** Normalized RI traces (left) and number distribution plot (right) of the initial precursors (dashed line) and the homocoupling (solid line) of pNAM<sub>10</sub>-NCO combining equal amounts of the polymers modified with exactly one equivalent of azidopropylamine or DBCO-NH<sub>2</sub>, respectively.

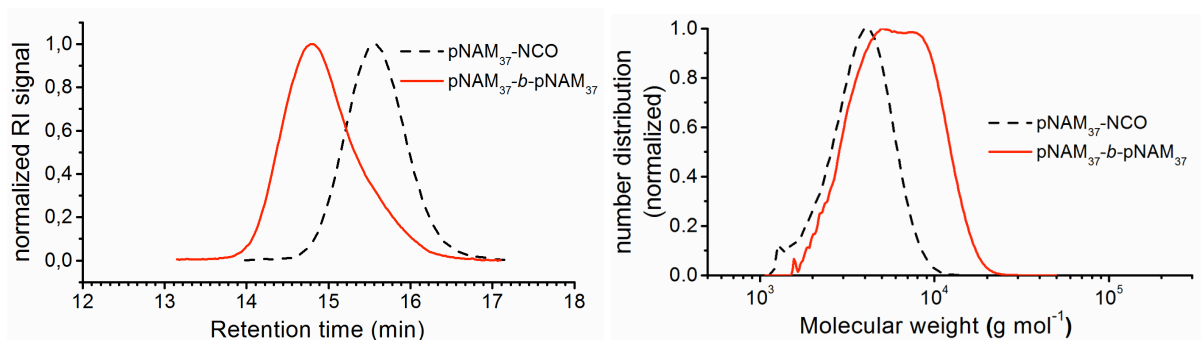

**Figure S 16.** Number distribution plot of the initial precursors (dashed line) and the homocoupling (solid line) of pNAM<sub>37</sub>-NCO combining equal amounts of the polymers modified with exactly one equivalent of azidopropylamine or DBCO-NH<sub>2</sub>, respectively.

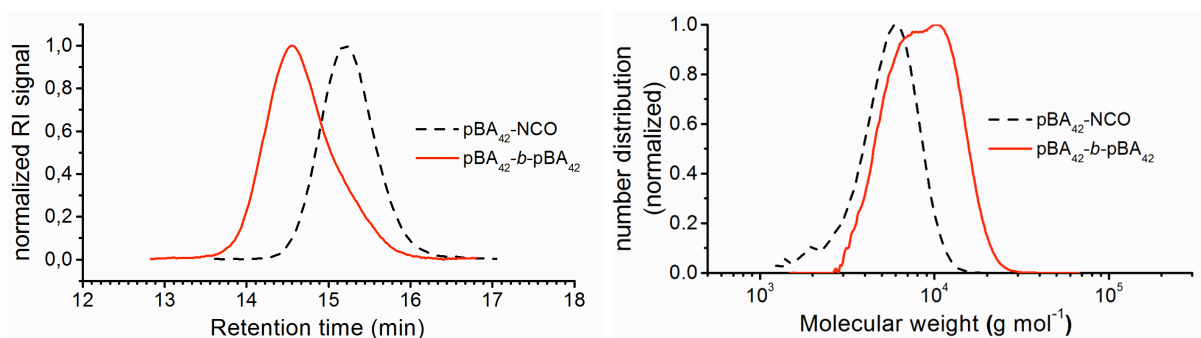

**Figure S 17.** Normalized RI traces (left) and number distribution plot (right) of the initial precursors (dashed line) and the homocoupling (solid line) of pBA<sub>42</sub>-NCO combining equal amounts of the polymers modified with exactly one equivalent of azidopropylamine or DBCO-NH<sub>2</sub>, respectively.

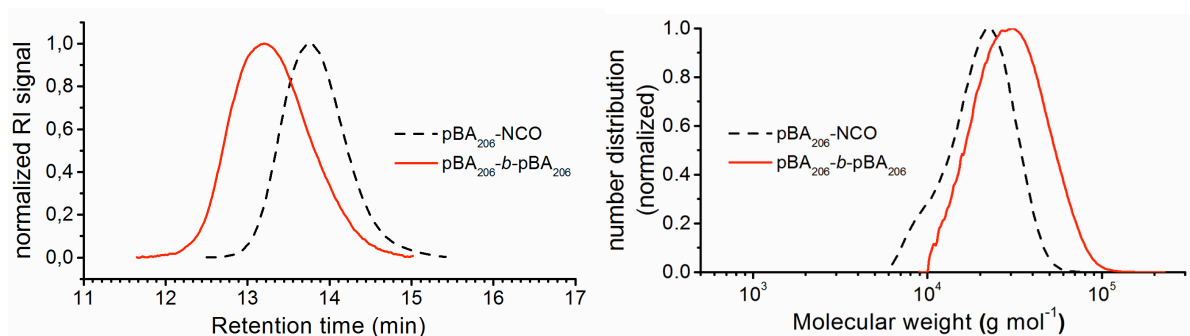

**Figure S 18.** Normalized RI traces (left) and number distribution plot (right) of the initial precursors (dashed line) and the homocoupling (solid line) of pBA<sub>206</sub>-NCO combining equal amounts of the polymers modified with exactly one equivalent of azidopropylamine or DBCO-NH<sub>2</sub>, respectively.

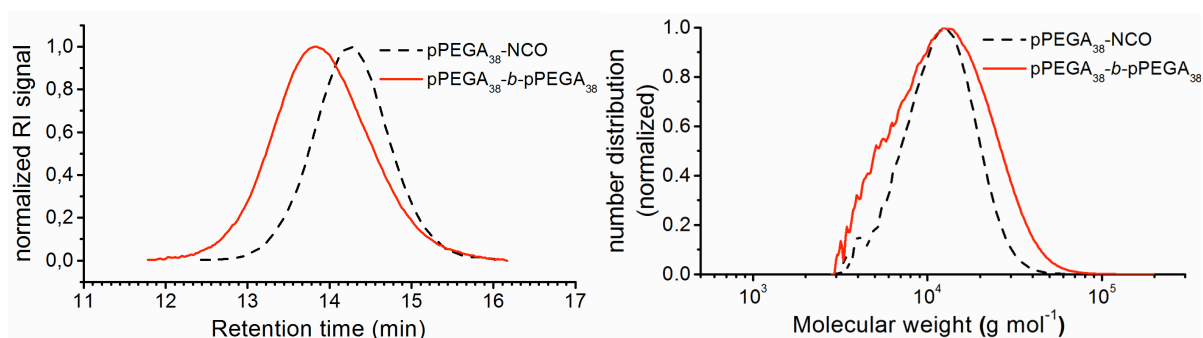

**Figure S 19.** Normalized RI traces (left) and number distribution plot (right) of the initial precursors (dashed line) and the homocoupling (solid line) of pPEGA<sub>38</sub>-NCO combining equal amounts of the polymers modified with exactly one equivalent of azidopropylamine or DBCO-NH<sub>2</sub>, respectively.

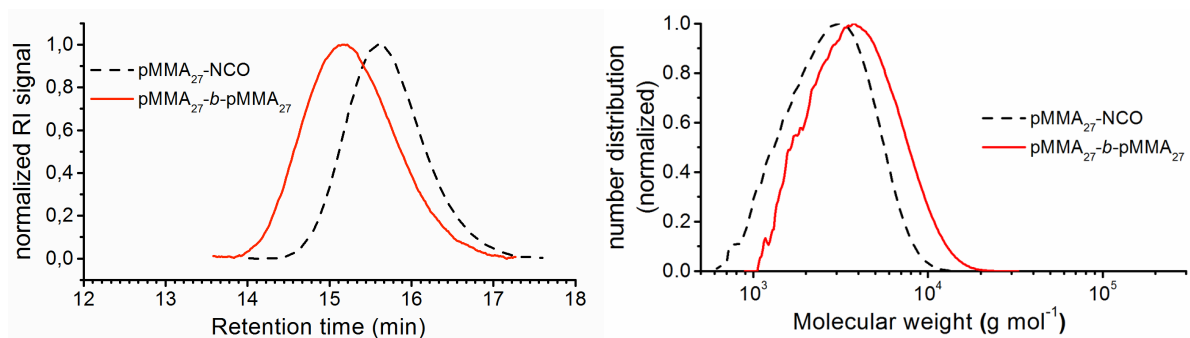

**Figure S 20.** Normalized RI traces (left) and number distribution plot (right) of the initial precursors (dashed line) and the homocoupling (solid line) of pMMA<sub>27</sub>-NCO combining equal amounts of the polymers modified with exactly one equivalent of azidopropylamine or DBCO-NH<sub>2</sub>, respectively.

## Deconvolutions of homocouplings

Although Poisson distributions are accepted models of molecular weight distributions (number distribution) obtained by living polymerization, they are typically limited excellently controlled polymerizations and the resulting very narrow dispersities ( $\mathcal{D} < 1.05$ ). For controlled radical polymerization techniques, Gaussian distributions are a good approximation which takes into account the broadening of the molecular weight due to side reaction of irreversible transfer and termination. In order to quantify the efficiency of the coupling reactions, the number distribution obtained by SEC was deconvoluted using Gaussian curves. The position of the initial starting material (single chains) was determined from the number distribution plots of the SEC traces of the polymerization solutions.

The percentage of coupled chains or the efficiency of the coupling was determined using equation 1:

$$\% \text{ coupled polymer chains} = \frac{\% \text{ Area coupled chains} * 2}{\% \text{ Area coupled chains} * 2 + \% \text{ Area single chains}} \times 100 \quad (1)$$

**Table S 1.** Fitted percentage peak areas for single and coupled chains and the resulting coupling efficiencies for the homocoupling reactions.

| sample              | area (%)<br>single chains | area (%)<br>coupled chains | coupling<br>efficiency |
|---------------------|---------------------------|----------------------------|------------------------|
| pNAM <sub>37</sub>  | 85                        | 15                         | 92%                    |
| pBA <sub>42</sub>   | 83                        | 17                         | 91%                    |
| pBA <sub>206</sub>  | 83                        | 17                         | 91%                    |
| pPEGA <sub>38</sub> | 49                        | 51                         | 68%                    |
| pMMA <sub>27</sub>  | 81                        | 19                         | 90%                    |

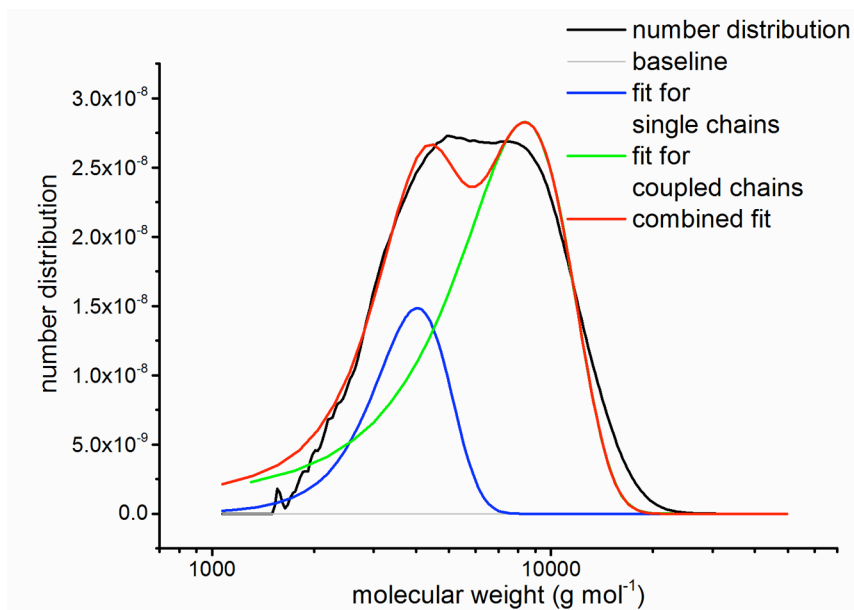

| Peak | Fit for        | FWHM | Centre (g mol <sup>-1</sup> ) | Area (%) |
|------|----------------|------|-------------------------------|----------|
| 1    | Single chains  | 2402 | 4033                          | 14.63    |
| 2    | Coupled chains | 7415 | 8368                          | 85.37    |

**Figure S 21.** Deconvolution of the SEC number distribution for the homocoupling of pNAM<sub>37</sub>.

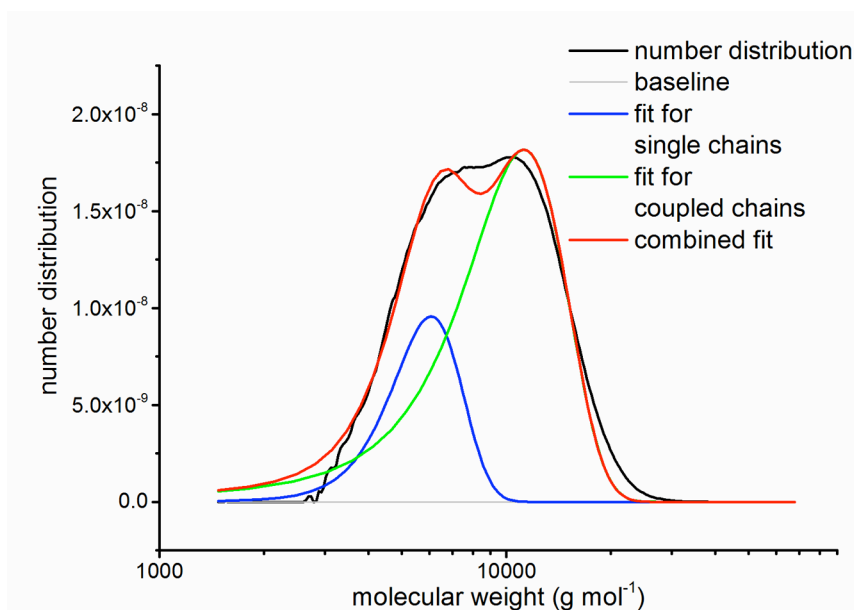

| Peak | Fit for        | FWHM | Centre (g mol <sup>-1</sup> ) | Area (%) |
|------|----------------|------|-------------------------------|----------|
| 1    | Single chains  | 3279 | 6065                          | 16.65    |
| 2    | Coupled chains | 8673 | 11222                         | 83.35    |

**Figure S 22.** Deconvolution of the SEC number distribution for the homocoupling of pBA<sub>42</sub>.

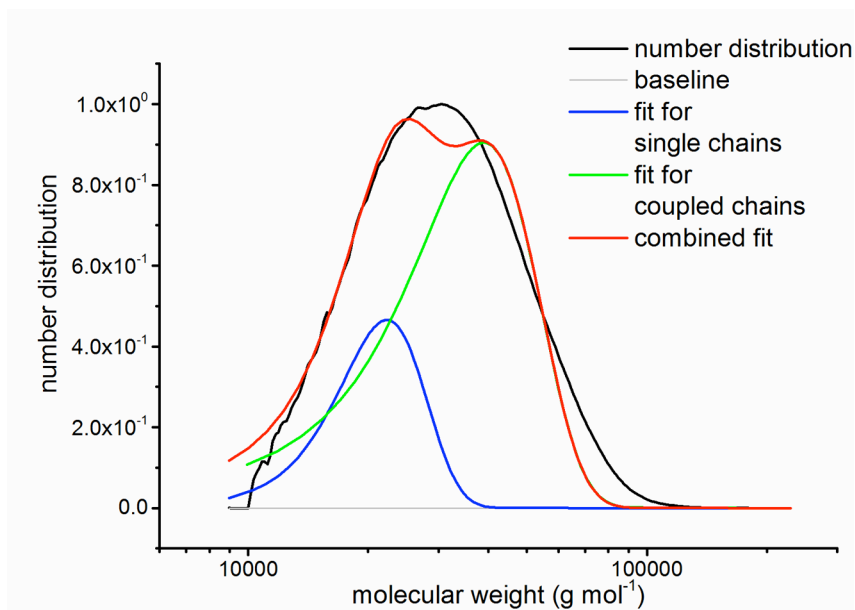

| Peak | Fit for        | FWHM  | Centre ( $\text{g mol}^{-1}$ ) | Area (%) |
|------|----------------|-------|--------------------------------|----------|
| 1    | Single chains  | 12989 | 22268                          | 16.90    |
| 2    | Coupled chains | 33131 | 38992                          | 83.10    |

**Figure S 23.** Deconvolution of the SEC number distribution for the homocoupling of pBA<sub>206</sub>.

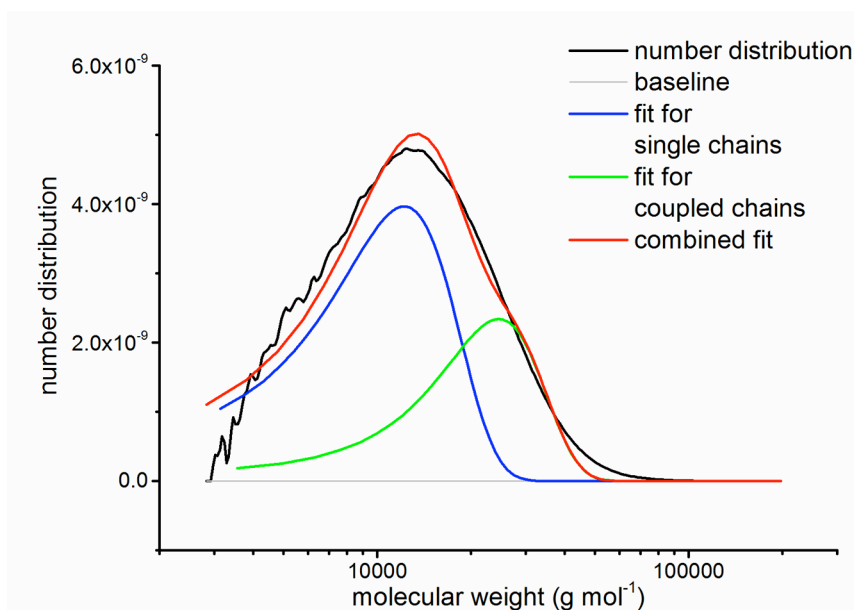

| Peak | Fit for        | FWHM  | Centre ( $\text{g mol}^{-1}$ ) | Area (%) |
|------|----------------|-------|--------------------------------|----------|
| 1    | Single chains  | 13071 | 12200                          | 49.33    |
| 2    | Coupled chains | 21932 | 24540                          | 50.67    |

**Figure S 24.** Deconvolution of the SEC number distribution for the homocoupling of pPEGA<sub>38</sub>.

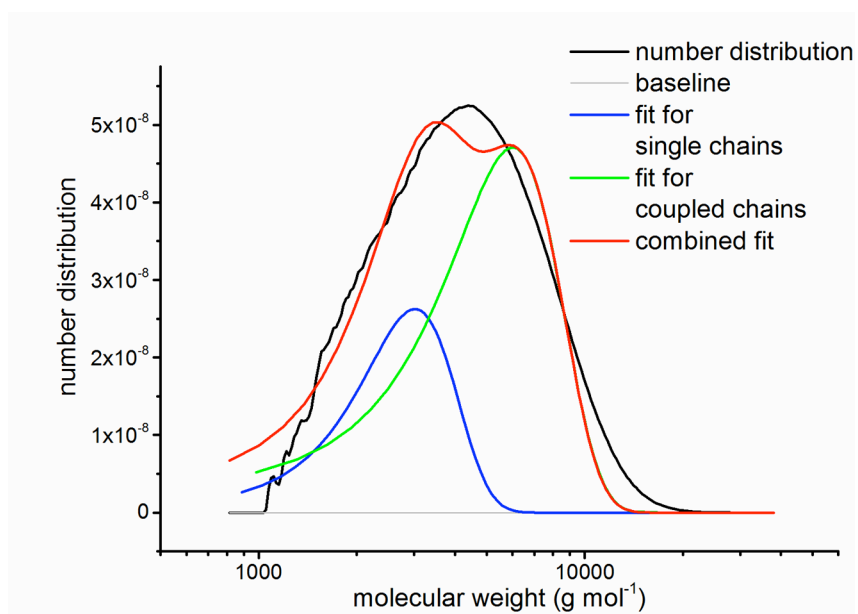

| Peak | Fit for        | FWHM | Centre (g mol <sup>-1</sup> ) | Area (%) |
|------|----------------|------|-------------------------------|----------|
| 1    | Single chains  | 2335 | 3014                          | 18.77    |
| 2    | Coupled chains | 5642 | 6015                          | 80.23    |

**Figure S 25.** Deconvolution of the SEC number distribution for the homocoupling of pMMA<sub>27</sub>.

### Stability of strained alkynes in solution

To test the stability of the reagents in solution, homocoupling reactions of pBA<sub>42</sub> (see Figure 5 in the publication) were repeated after storing DBCO-NH<sub>2</sub> and BCN-NH<sub>2</sub> in DMF at -18°C for 4 months.

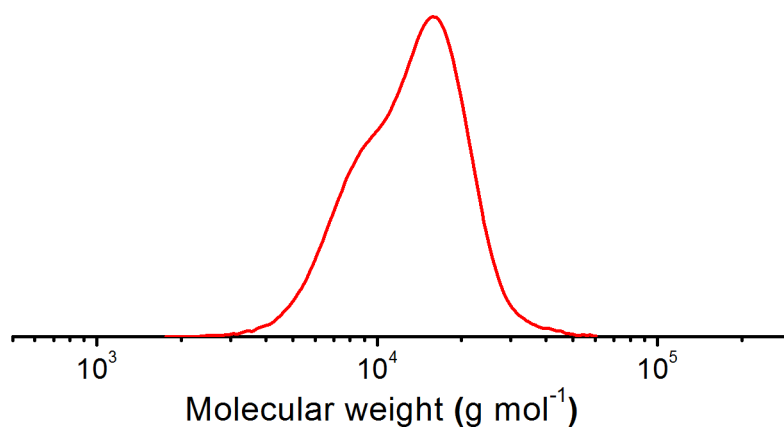

**Figure S 26.** SEC traces for the homocoupling of pBA<sub>42</sub> with BCN-NH<sub>2</sub> after storing the stock solution for 4 months.

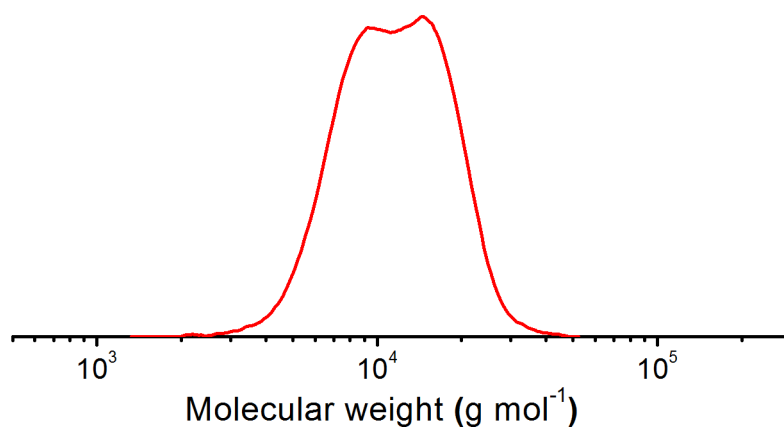

**Figure S 27.** SEC traces for the homocoupling of pBA<sub>42</sub> with DBCO-NH<sub>2</sub> after storing the stock solution for 4 months.

## Number distribution plots of combinations

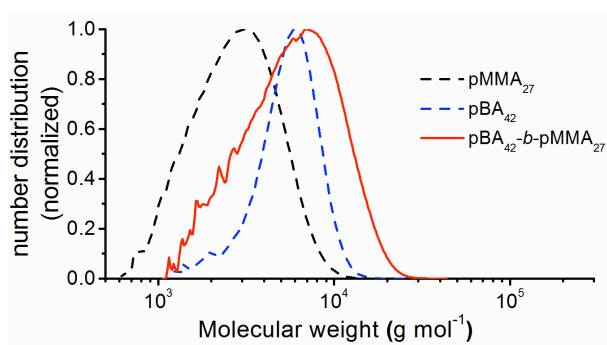

**Figure S 28.** Number distribution plots of the initial precursors (dashed lines) pMMA<sub>27</sub> (black), pBA<sub>42</sub> (blue) and the coupled block copolymer (solid red line) pMMA<sub>27</sub>-*b*-pBA<sub>42</sub>.

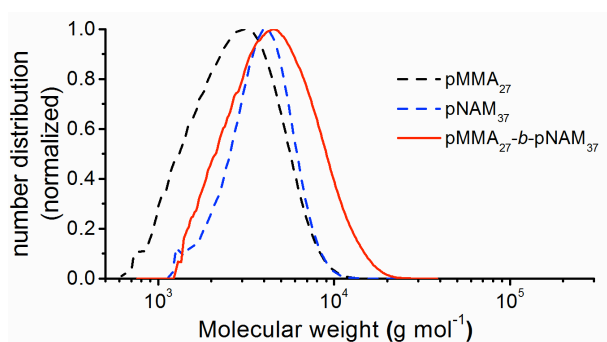

**Figure S 29.** Number distribution plots of the initial precursors (dashed lines) pMMA<sub>27</sub> (black), pNAM<sub>37</sub> (blue) and the coupled block copolymer (solid red line) pMMA<sub>27</sub>-*b*-pNAM<sub>37</sub>.

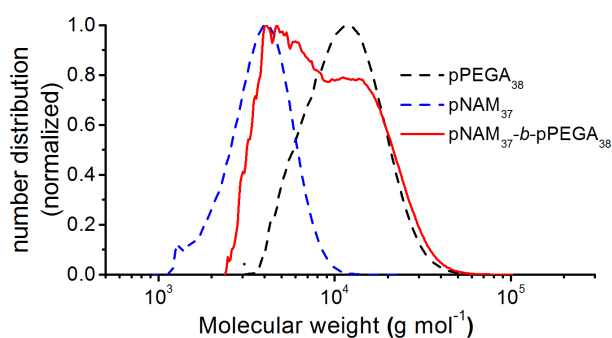

**Figure S 30.** Number distribution plots of the initial precursors (dashed lines) pPEG<sub>38</sub> (black), pNAM<sub>37</sub> (blue) and the coupled block copolymer (solid red line) pNAM<sub>37</sub>-*b*-pPEG<sub>38</sub>.



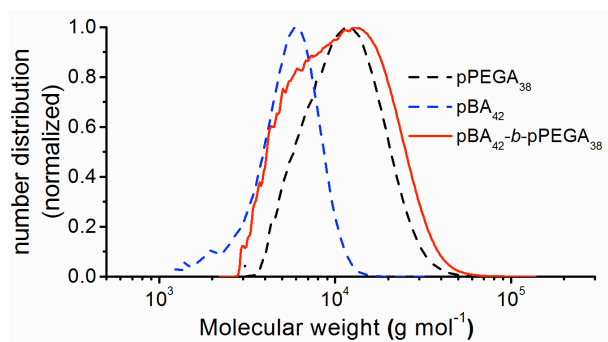

**Figure S 31.** Number distribution plots of the initial precursors (dashed lines) pPEGA<sub>38</sub> (black), pBA<sub>42</sub> (blue) and the coupled block copolymer (solid red line) pBA<sub>42</sub>-*b*-pPEGA<sub>38</sub>.
